# Supplementary material for: Isotopic constraints on atmospheric sulfate formation pathways in theMt. Everest region, southern Tibetan Plateau
Source: Copernicus journal article supplement (doi:10.5194/acp-2020-1279), 2021-01-12
Supplement: Supplementary file 1 [file acp-2020-1279-supplement.zip]

Archive with 2 entries (2 files):
- FigureS1.pdf
- Supplement_raw data.xlsx
