# Supplementary material for: Isotopic constraints on atmospheric sulfate formation pathways in theMt. Everest region, southern Tibetan Plateau
Source: Copernicus journal article supplement (doi:10.5194/acp-2020-1279), 2021-01-12
Supplement: Supplementary file 1 [file acp-2020-1279-supplement.zip › FigureS1.pdf]

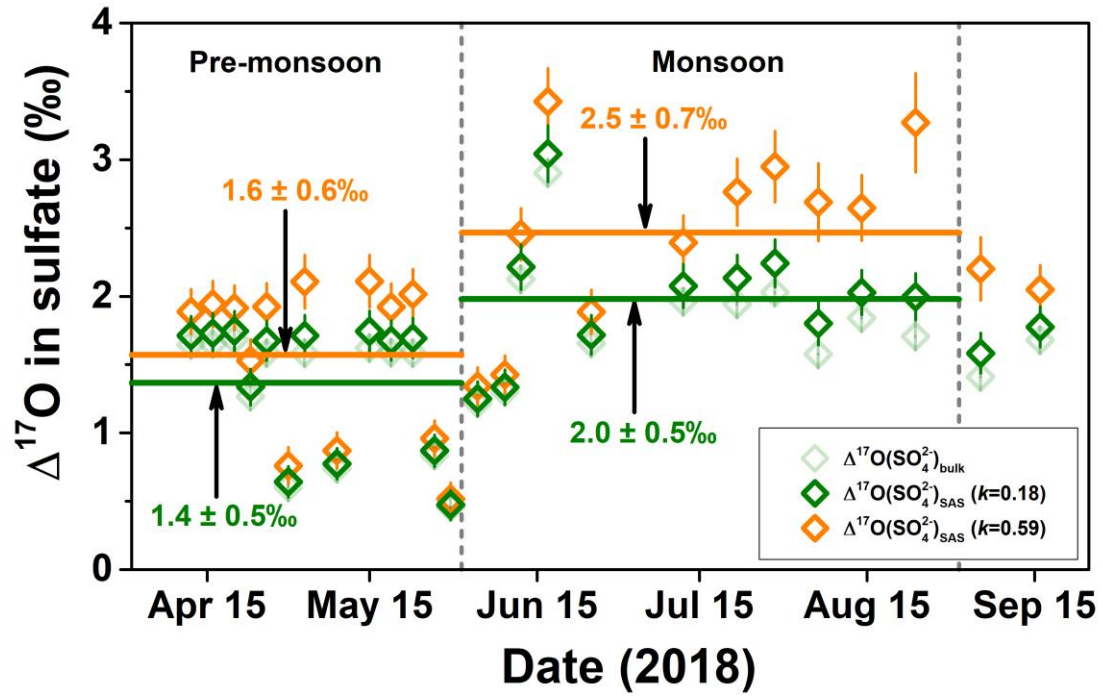

Figure S1: Seasonal changes in (a)  $\Delta^{17}\text{O}(\text{SO}_4^{2-})_{\text{bulk}}$  and  $\Delta^{17}\text{O}(\text{SO}_4^{2-})_{\text{SAS}}$  calculated using a  $k$  value (mass ratio of  $\text{SO}_4^{2-}$  to  $\text{Ca}^{2+}$ ) of 0.59 and 0.18. The lines indicate the seasonally average values of  $\Delta^{17}\text{O}$  with  $1\sigma$ -uncertainty.
