# Supplementary material for: Isotopic constraints on atmospheric sulfate formation pathways in theMt. Everest region, southern Tibetan Plateau
Source: Copernicus journal article supplement (doi:10.5194/acp-2020-1279), 2021-01-12
Supplement: Supplementary file 1 [file Supplement_raw data.xlsx]

## Sheet: Fig.2
Dataset for Fig. 2: Observed concentrations of water-soluble ionic species and black carbon (BC).
concentrations of water-soluble ionic species for TSP								concentrations of black carbon (BC)
Sampling date		K+ (nmol m-3)	Ca2+ (nmol m-3)	NO3- (nmol m-3)	SO42- (nmol m-3)	nd-SO42- (nmol m-3)		Sampling date	BC (mg m-3)
start	end
2018-04-10	2018-04-14	0.73673	4.45423	9.46391	8.47161	8.13754		2018-04-01	0.53036
2018-04-14	2018-04-18	2.73271	12.9916	18.0528	21.2618	20.2874		2018-04-02	0.30877
2018-04-18	2018-04-22	2.12796	8.22044	13.6517	16.4982	15.8817		2018-04-03	0.33023
2018-04-22	2018-04-25	4.91419	17.2354	23.5553	24.6117	23.3191		2018-04-04	0.26658
2018-04-25	2018-04-28	1.47813	10.4085	17.6241	14.4974	13.7167		2018-04-05	0.15515
2018-04-28	2018-05-01	1.4877	10.0751	13.5862	11.9295	11.1738		2018-04-06	0.26622
2018-05-01	2018-05-05	1.3571	14.4514	21.4529	14.3212	13.2374		2018-04-07	0.44087
2018-05-05	2018-05-13	1.55895	9.40211	15.2479	15.1135	14.4083		2018-04-08	0.37685
2018-05-13	2018-05-17	1.39577	9.29277	14.252	9.86468	9.16773		2018-04-09	0.41512
2018-05-17	2018-05-21	0.73967	3.61138	5.45948	5.11243	4.84158		2018-04-10	0.44003
2018-05-21	2018-05-25	1.20522	5.08286	7.60091	5.84778	5.46656		2018-04-11	0.15534
2018-05-25	2018-05-29	2.91391	12.7269	16.0608	24.1008	23.1462		2018-04-12	0.17613
2018-05-29	2018-06-02	2.24313	10.0227	12.2446	20.4358	19.6841		2018-04-13	0.15433
2018-06-02	2018-06-06	0.69799	2.52887	6.21977	6.55889	6.36922		2018-04-14	0.4596
2018-06-08	2018-06-09	1.41535	5.8481	21.6971	15.916	15.4774		2018-04-15	0.46784
2018-06-09	2018-06-15	0.38501	1.87926	4.90062	3.43802	3.29707		2018-04-16	0.82558
2018-06-15	2018-06-20	0.78689	3.17088	9.01427	5.1005	4.86268		2018-04-17	0.66462
2018-06-20	2018-06-29	0.62164	2.65587	7.70174	5.32464	5.12545		2018-04-18	0.36031
2018-07-07	2018-07-17	0.24576	0.96065	2.49952	1.30242	1.23037		2018-04-19	0.46465
2018-07-17	2018-07-28	0.19438	1.34758	2.14986	1.11332	1.01226		2018-04-20	0.35469
2018-07-28	2018-08-01	0.18977	1.88425	2.50035	1.48296	1.34165		2018-04-21	0.43015
2018-08-01	2018-08-11	0.2118	2.56746	2.41114	1.52366	1.3311		2018-04-22	0.32297
2018-08-11	2018-08-17	0.23165	1.7282	2.33501	1.3956	1.26598		2018-04-23	0.53454
2018-08-17	2018-09-01	0.22911	2.66151	2.0019	1.36842	1.16881		2018-04-24	1.722
2018-09-01	2018-09-10	0.40598	4.08208	4.15578	2.79477	2.48861		2018-04-25	0.40842
2018-09-11	2018-09-21	0.56267	3.37125	5.19267	4.58182	4.32898		2018-04-26	0.13434
								2018-04-27	0.127
								2018-04-28	0.18517
								2018-04-29	0.26226
								2018-04-30	0.1549
								2018-05-01	0.18233
								2018-05-02	0.19451
								2018-05-03	0.28587
								2018-05-04	0.19331
								2018-05-05	0.19407
								2018-05-06	0.19391
								2018-05-07	0.17674
								2018-05-08	0.26338
								2018-05-09	0.33623
								2018-05-10	0.23552
								2018-05-11	0.21163
								2018-05-12	0.15795
								2018-05-13	0.33115
								2018-05-14	0.30182
								2018-05-15	0.26952
								2018-05-16	0.33389
								2018-05-17	0.16191
								2018-05-18	0.12444
								2018-05-19	0.1316
								2018-05-20	0.18241
								2018-05-21	0.15569
								2018-05-22	0.32967
								2018-05-23	0.17121
								2018-05-24	0.13962
								2018-05-25	0.13532
								2018-05-26	0.39442
								2018-05-27	0.45825
								2018-05-28	0.93551
								2018-05-29	0.56978
								2018-05-30	0.3772
								2018-05-31	0.31556
								2018-06-01	0.31922
								2018-06-02	0.23166
								2018-06-03	0.15471
								2018-06-04	0.21978
								2018-06-05	0.13752
								2018-06-06	0.1392
								2018-06-07	0.20957
								2018-06-08	0.10625
								2018-06-09	0.116
								2018-06-10	0.102
								2018-06-11	0.07678
								2018-06-12	0.08642
								2018-06-13	0.15853
								2018-06-14	0.08924
								2018-06-15	0.1463
								2018-06-16	0.18473
								2018-06-17	0.1241
								2018-06-18	0.17676
								2018-06-19	0.2485
								2018-06-20	0.21802
								2018-06-21	0.16222
								2018-06-22	0.12714
								2018-06-23	0.18401
								2018-06-24	0.10131
								2018-06-25	0.06829
								2018-06-26	0.05478
								2018-06-27	0.06028
								2018-06-28	0.04874
								2018-06-29	0.11624
								2018-06-30	0.13973
								2018-07-01	0.03799
								2018-07-02	0.05107
								2018-07-03	0.18859
								2018-07-04	0.07108
								2018-07-05	0.05719
								2018-07-06	0.08851
								2018-07-07	0.05858
								2018-07-08	0.05745
								2018-07-09	0.0776
								2018-07-10	0.05285
								2018-07-11	0.08227
								2018-07-12	0.06273
								2018-07-13	0.06039
								2018-07-14
								2018-07-15	0.05601
								2018-07-16	0.09985
								2018-07-17	0.09492
								2018-07-18	0.0474
								2018-07-19	0.08294
								2018-07-20	0.07454
								2018-07-21	0.05768
								2018-07-22	0.06803
								2018-07-23	0.12656
								2018-07-24	0.13646
								2018-07-25	0.10154
								2018-07-26	0.09543
								2018-07-27	0.07937
								2018-07-28	0.09454
								2018-07-29	0.11215
								2018-07-30	0.09028
								2018-07-31	0.10386
								2018-08-01	0.08564
								2018-08-02	0.16678
								2018-08-03	0.06766
								2018-08-04	0.1571
								2018-08-05	0.16214
								2018-08-06	0.07767
								2018-08-07	0.12317
								2018-08-08	0.21624
								2018-08-09	0.09778
								2018-08-10	0.10848
								2018-08-11	0.06519
								2018-08-12
								2018-08-13
								2018-08-14	0.10673
								2018-08-15	0.08949
								2018-08-16	0.11029
								2018-08-17	0.13934
								2018-08-18	0.11881
								2018-08-19
								2018-08-20
								2018-08-21
								2018-08-22	0.17237
								2018-08-23	0.0437
								2018-08-24	0.19133
								2018-08-25	0.16193
								2018-08-26	0.11556
								2018-08-27	0.1537
								2018-08-28	0.15344
								2018-08-29	0.07818
								2018-08-30	0.09868
								2018-08-31	0.1414
								2018-09-01	0.10808
								2018-09-02	0.1201
								2018-09-03	0.14814
								2018-09-04	0.12145
								2018-09-05	0.12673
								2018-09-06	0.15845
								2018-09-07	0.12499
								2018-09-08	0.85346
								2018-09-09
								2018-09-10	0.21393
								2018-09-11	0.1841
								2018-09-12	0.23834
								2018-09-13	0.16384
								2018-09-14	0.15582
								2018-09-15	0.10614
								2018-09-16	0.10295
								2018-09-17	0.13839
								2018-09-18	0.16716
								2018-09-19	0.13788
								2018-09-20	0.21607
								2018-09-21	0.086
								2018-09-22
								2018-09-23	0.15382
								2018-09-24	0.21821
								2018-09-25	0.15371
								2018-09-26	0.17471
								2018-09-27	0.29955
								2018-09-28	0.21189
								2018-09-29	0.30507
								2018-09-30	0.41399

## Sheet: Fig.4
Dataset for Fig. 4: Observed D17O in bulk atmospheric sulfate (D17O(SO42-)bulk), secondary atmospheric sulfate (D17O(SO42-)SAS), and atmospheric nitrate (D17O(NO3-)) collected from the Mt. Everest region in 2018.
	D17O values in sulfate							D17O values in nitrate
	Sampling date		D17O(SO42-)bulk (‰)		D17O(SO42-)SAS (‰)			Sampling date		Δ17O(NO3-) (‰)
	start	end	value	1s	value	1s		start	end	value	1s
Pre-monsoon	2018-04-10	2018-04-14	1.64428	0.1	1.71178	0.14358		2018-04-10	2018-04-14	28.5938	0.3
	2018-04-14	2018-04-18	1.65123	0.1	1.73053	0.145083		2018-04-14	2018-04-18	27.7658	0.3
	2018-04-18	2018-04-22	1.68064	0.1	1.74589	0.144702		2018-04-18	2018-04-22	28.6942	0.3
	2018-04-22	2018-04-25	1.26615	0.1	1.33634	0.131104		2018.4.22	2018.4.25	28.7865	0.3
	2018-04-25	2018-04-28	1.58364	0.1	1.67377	0.143787		2018-04-25	2018-04-28	30.9014	0.3
	2018-04-28	2018-05-01	0.60125	0.1	0.641905	0.11319		2018-04-28	2018-05-01	29.7762	0.3
	2018-05-01	2018-05-05	1.58364	0.1	1.71331	0.148088		2018-05-01	2018-05-05	29.5047	0.3
	2018-05-05	2018-05-13	0.73846	0.1	0.774601	0.114111		2018-05-05	2018-05-09	27.1562	0.3
	2018-05-13	2018-05-17	1.62034	0.1	1.74353	0.148666		2018-05-09	2018-05-13	27.9931	0.3
	2018-05-17	2018-05-21	1.5871	0.1	1.67589	0.143766		2018-05-13	2018-05-17	27.6609	0.3
	2018-05-21	2018-05-25	1.58372	0.1	1.69417	0.14599		2018-05-17	2018-05-21	24.7095	0.3
	2018-05-25	2018-05-29	0.83519	0.1	0.869635	0.11561		2018-05-21	2018-05-25	24.9511	0.3
	2018-05-29	2018-06-02	0.45549	0.1	0.472886	0.107342		2018-05-25	2018-05-29	27.0981	0.3
Monsoon	2018-06-02	2018-06-06	1.21514	0.1	1.25133	0.125573		2018-05-29	2018-06-02	27.5611	0.3
	2018-06-08	2018-06-09	1.29832	0.1	1.33511	0.128238		2018-06-02	2018-06-06	26.7708	0.3
	2018-06-09	2018-06-15	2.1237	0.1	2.21449	0.165122		2018-06-08	2018-06-09	24.3033	0.3
	2018-06-15	2018-06-20	2.9013	0.1	3.04319	0.205323		2018-06-09	2018-06-15	24.7597	0.3
	2018-06-20	2018-06-29	1.65427	0.1	1.71856	0.143614		2018-06-15	2018-06-20	26.0927	0.3
	2018-07-07	2018-07-17	1.95992	0.1	2.07469	0.160727		2018-06-20	2018-06-25	22.4905	0.3
	2018-07-17	2018-07-28	1.94	0.1	2.1337	0.168122		2018-06-25	2018-06-29	25.4908	0.3
	2018-07-28	2018-08-01	2.02779	0.1	2.24138	0.173682		2018-06-29	2018-07-03	18.3322	0.3
	2018-08-01	2018-08-11	1.5744	0.1	1.80215	0.158796		2018-07-03	2018-07-07	23.3203	0.3
	2018-08-11	2018-08-17	1.84021	0.1	2.02862	0.163731		2018-07-07	2018-07-11	20.3925	0.3
	2018-08-17	2018-09-01	1.70564	0.1	1.99693	0.170352		2018-07-11	2018-07-17	19.1711	0.3
	2018-09-01	2018-09-10	1.41028	0.1	1.58377	0.14747		2018-07-17	2018-07-24	18.6227	0.3
	2018-09-11	2018-09-21	1.67789	0.1	1.77589	0.148048		2018-07-24	2018-07-28	21.7925	0.3
								2018-07-28	2018-08-01	19.9032	0.3
								2018-08-01	2018-08-07	19.3317	0.3
								2018-08-07	2018-08-11	19.8612	0.3
								2018-08-11	2018-08-17	19.409	0.3
								2018-08-17	2018-08-27	18.112	0.3
								2018-08-27	2018-09-01	19.199	0.3
								2018-09-01	2018-09-05	19.6482	0.3
								2018-09-05	2018-09-10	21.1579	0.3
								2018-09-11	2018-09-16	22.3601	0.3
								2018-09-16	2018-09-21	24.76	0.3

## Sheet: Fig.5
Dataset for Fig. 5: D17O (‰) in modern atmospheric sulfate observed at diverse geographic localities to date, including the TP region, polar regions, and other mid-latitude regions.
Mt. Everest, TP	Mt. Everest, TP (pre-monsoon)	Mt. Everest, TP (monsoon)	Nam Co, TP (pre-monsoon)	DDU, Antarctic (autumn-spring)	DDU, Antarctic (summer)	Dome C, Antarctic (autumn-spring)	Dome C, Antarctic (summer)	South Pole, Antarctic	Alert, Canada, Arctic	Wuhan, China	Beijing, China	Mt. Wuyi, China	Sichuan Basin, China	La Jolla, USA	Mt. Barcroft, USA	Baton Rouge, USA	Southwestern USA
1.71178	1.7	1.25133	1.11	1.5	1.5	1.9	2.21	0.9	1.1	0.46	1.5	1.22	2.5	0.8	1	0.8	2.4
1.73053	1.7	1.33511	2.36	2	1.3	1.62	2.23	0.8	1.3	0.58	1.7	1.17	1.76	0.8	1.1	0.52	0.99
1.74589	1.7	2.21449	1.34	1.3	0.9	1.82	2.29	1	0.6	0.47	1.1	1.57	2.08	0.7	1.3	0.26	1.05
1.33634	1.3	3.04319	3.52	1.8	1.4	2.01	1.52	0.9	0.5	0.38	1.2	1.59	1.58	0.6	1.5	0.52	0.67
1.67377	1.7	1.71856		2	1	1.49	1.31	0.9	0.5	0.14	1.1	1.26	1.77	0.8	1.6	1.23	1.14
0.641905	0.6	2.07469		2.6	1.2	2.01	1.23	0.9	0.4	0.71	1.1	1.11	1.96	0.8	1.4	0.52	0.95
1.71331	1.7	2.1337		2.3	1.4	2.01	1.05	1.8	0.6	0.32	1.6	1.21		1	1.5	0.4	0.88
0.774601	0.8	2.24138		3.2	1	2.48	1.16	1.2	0.6	0.47	1.1	1.28		0.8		0.55	0.63
1.74353	1.7	1.80215		2	1	1.82	1	1.3	1.1	0.5	1.2	1		1		1.04	0.54
1.67589	1.7	2.02862		2.1	1.4	2.68	1.51	1.2	0.8	0.42	0.8	1.27		1.2		0.59	0.93
1.69417	1.7	1.99693		2.5	1.2	2.28	1.5	1	1.1	0.59	1.2	1.19		1.3		0.37	0.48
0.869635	0.9			2.8	1.1	1.32	0.94	1.1	1	0.6	1	1.07		1.4		1.43	0.45
0.472886	0.5			2.5	1.2	2.39	1.04	1.2		0.48	1.5	1.08		0.9		0.56	0.17
1.25133				1.8	1.1	2.67	1.63	0.8		0.65	1.4	1.09		1.1		0.66	0.8
1.33511				1.8		2.49	0.91	1.1		0.48	1.2	1.23		0.6		0.75	0.95
2.21449				3.4		2.3		1.4		0.35	1.2	1.23		1.6		0.96	3.59
3.04319				2.5		2.44		1.6		0.7	3.1	1.32		0.59		0.37	4.23
1.71856				2.1		2.41		1.6		0.66	1.6	1.21		0.59		0.4	1.47
2.07469				0.9		2.17		1.7		0.98	1	1.39		0.47		0.62	0.68
2.1337				3.3		2.28		1.5		0.62	0.9	1.28		0.53		0.32	1.03
2.24138				2.4		2.71				0.83	0.9			1.09			0.52
1.80215				1.8		2.38				1.02	1			0.87			0.92
2.02862				2		2.18				0.85	1.6			0.99			1.12
1.99693				2.5		1.93				0.5	1.4			0.8			0.7
1.58377				2.3		1.83				0.7	0.4			1.01			1.69
1.77589				2		1.86				0.56	0.1			0.98			0.85
				2.4		2.31				0.58	0.4			0.95			0.44
				2.1		1.31				0.58	2.1			0.94			0.02
				1.8		2.07				0.49	0.8			1.04			0.09
				1.7		2.4				0.41	0.6			1.5			1.03
				1.1		1.69				0.53	0.7			1.47			0.35
				1		1.27				0.19	0.5			1.42			0.44
				1		2.27					1.1			0.78			0.02
						1.52					1.8			0.61			0.09
														0.82			1.03
																	0.35
																	0.44
																	0.57
																	0.17
																	0.71
																	0.51
																	0.38
																	1.48
																	3.47
																	0.42
																	0.66
																	0.07
																	1.42
																	0.23
																	0.33
																	2.42
																	1.29
																	2.76
																	2.09
																	2.72
																	3
																	2.18
																	2.09
																	2.66
																	2.04
																	1.19
																	1.22
																	1.45
																	1.64
																	1.57
																	0.96
																	1.8
																	2.43
																	3.24
																	2.94
																	0.92

## Sheet: Fig.6
Dataset for Fig. 6: Values of relative humidity (RH), monthly weighted average values of D17O in non-dust sulfate with 1σ-uncertainty, relative humidity along with backward trajectories arriving at the sampling sites (RHtraj), ozone mixing ratio at surface level at NCO-P, ozone mixing ratio at 500 hPa at QOMS, solar radiation fluxes along with backward trajectories arriving at the sampling sites …
Date	SRtraj (w m-2)	Temperature (℃)	Ozone_QOMS (ppb)	RHtraj (%)	RH (%)		Monthly weighted mean D17O (‰)
							Month/2018	D17O	1σ
2018-03-01	254.936	0.32	80.2299	47.9926	44.28		Apr	1.52535	0.435317
2018-03-02	224.632	-0.48	73.9853	62.6124	44.65		May	1.03294	0.54865
2018-03-03	235.94	-0.11	90.9441	54.3992	32.36		Jun	1.90288	0.737869
2018-03-04	250.3	-0.41	89.1707	48.7876	42.25		Jul	2.12855	0.0845215
2018-03-05	235.774		94.3265	34.2884			Aug	1.93871	0.122631
2018-03-06	244.15	-2.38	83.1418	39.0554	14.2		Sep	1.71038	0.135847
2018-03-07	250.502	-1.98	79.3493	35.4653	22.08
2018-03-08	252.464		89.2485	33.4587
2018-03-09	264.07		96.9077	33.5388
2018-03-10	272.021	-1.35	79.2264	28.619	37.06
2018-03-11	271.714	-1.93	61.9389	33.6364	30.95
2018-03-12	266.981	-2.71	54.8693	38.9141	45.31
2018-03-13	262.314	0.46	67.6732	58.8479	34.39
2018-03-14	281.199	1.42	86.5266	35.9463	16.95
2018-03-15	262.984	0.21	92.6427	44.1033	40.52
2018-03-16	272.231	0.35	88.6876	42.2017	22.49
2018-03-17	272.669	-1.43	85.3807	37.2603	30.85
2018-03-18	279.136	-1.86	87.5895	33.1198	30.09
2018-03-19	285.201	-0.17	94.6072	31.9207	13.19
2018-03-20	286.917	0.89	101.694	42.9479	21.35
2018-03-21	291.228	1.47	91.2438	29.5893	21.72
2018-03-22	291.023	0.43	105.901	22.6711	35.91
2018-03-23	293.777	-0.15	94.7626	28.5653	38.12
2018-03-24	291.183	0.98	92.0225	26.757	30.15
2018-03-25	294.714	0.51	86.3619	27.2521	38.01
2018-03-26	263.945	-1.26	74.5642	28.3016	51.76
2018-03-27	267.831	0.7	108.671	45.5653	32.1
2018-03-28	285.433	1.96	83.0642	35.9256	20.44
2018-03-29	296.731	2.99	79.1034	36.8488	34.19
2018-03-30	287.581	0.23	84.5644	40.957	28.97
2018-03-31	259.321	-2.38	85.1884	54.2331	55.52
2018-04-01	252.932	-0.3	60.8701	36.0496	46.83
2018-04-02	285.709	1.47	71.6713	36.7041	35.44
2018-04-03	310.445	2.13	97.6814	33.3174	43
2018-04-04	264.784	2.41	83.608	57.1149	47.05
2018-04-05	264.334	1.69	90.4714	55.1107	58.89
2018-04-06	288.024	1.76	77.1767	52.9297	63.25
2018-04-07	269.087	3.1	92.7901	51.9479	55.69
2018-04-08	273.988	2.58	99.6713	53.7322	50.81
2018-04-09	268.35	2.74	103.77	60.6579	49.85
2018-04-10	271.56	3.32	95.7325	63.3975	47.74
2018-04-11	250.109	5.14	86.9113	64.2504	44.81
2018-04-12	261.399	3.61	100.843	57.9446	52.33
2018-04-13	294.793	3.04	102.183	49.8116	37.94
2018-04-14	277.037	2.74	121.288	50.2876	39.77
2018-04-15	303.839	2.26	88.1225	42.7578	49.25
2018-04-16	322.583	2.96	82.2785	29.9438	45.22
2018-04-17	306.412	2.64	79.9068	46.0388	55.56
2018-04-18	298.169	4.54	108.008	48.9703	43.17
2018-04-19	264.526	4.65	121.446	58.8992	40.41
2018-04-20	294.913	5.13	99.5829	58.1851	38.93
2018-04-21	294.083	4.93	99.4279	56.6422	39.19
2018-04-22	299.967	4.53	109.766	32.276	32.54
2018-04-23	307.254	4.05	133.706	30.2802	32.17
2018-04-24	296.355	3.27	114.62	41.0339	37.6
2018-04-25	270.458	2.65	70.7448	44.9496	50.3
2018-04-26	321.107	2.68	73.3433	35.2777	43.87
2018-04-27	303.474	2.72	71.9609	58.8479	45.22
2018-04-28	285.659	2.28	82.9222	61.7479	54.08
2018-04-29	273.383	3.42	75.3051	57.5893	57.71
2018-04-30	236.194	1.88	82.6259	61.4793	73.35
2018-05-01	302.532	1.89	84.6104	30.576	54.13
2018-05-02	321.133	4.16	143.877	37.4041	40.09
2018-05-03	236.347	4.06	93.5234	73.0595	49.81
2018-05-04	240.514	5.48	95.5277	67.3826	38.39
2018-05-05	239.017	5.9	113.217	66.119	42.99
2018-05-06	274.215	6.67	99.4966	64.2281	43.45
2018-05-07	244.595	7.13	101.975	68.443	40.26
2018-05-08	261.228	7.35	104.333	66.0645	25.97
2018-05-09	274.677	4.86	111.159	65.3504	39.67
2018-05-10	325.74	4.29	93.4256	36.3802	30.99
2018-05-11	356.588	4.7	116.274	34.376	29.08
2018-05-12	353.414	6.3	97.7692	39.0297	16.91
2018-05-13	377.554	6.49	78.9566	26.3413	35.78
2018-05-14	269.977	6.15	95.8065	53.3355	46.37
2018-05-15	257.551	4.83	94.6396	61.6165	51.81
2018-05-16	225.684	6.54	90.1701	65.4008	48.47
2018-05-17	239.855	6.92	100.496	71.738	48.48
2018-05-18	224.179	7.45	116.242	73.7736	47.86
2018-05-19	257.604	7.64	107.103	69.9959	47.22
2018-05-20	270.874	9.02	134.485	66.7488	46.35
2018-05-21	303.826	10.97	126.828	60.6058	38.54
2018-05-22	257.96	11.07	102.592	68.7603	41.07
2018-05-23	269.307	11.02	93.4427	69.0074	41.99
2018-05-24	265.836	10.08	102.286	71.724	46.29
2018-05-25	277.008	9.76	102.119	73.805	41.74
2018-05-26	291.704	10.25	112.498	73.5207	40.29
2018-05-27	260.779	9.88	116.241	76.2198	36.22
2018-05-28	264.92	7.7	82.8349	75.3289	43.88
2018-05-29	261.959	5.81	104.169	78.6446	54.28
2018-05-30	319.892	6.99	100.029	62.905	50.98
2018-05-31	290.026	8.47	70.8734	70.1306	47.42
2018-06-01	275.713	8.8	95.0659	71.5529	52.63
2018-06-02	314.351	8.64	82.3383	67.8546	46.9
2018-06-03	296.848	5.91	74.1483	71.8124	64.72
2018-06-04	282.566	6.7	102.399	46.2471	64.58
2018-06-05	314.945	9.49	81.0575	45.2975	52.39
2018-06-06	308.672	10.97	81.6797	73.1025	48.78
2018-06-07	311.568	10.18	74.0627	69.5124	59.52
2018-06-08	289.422	10.14	68.692	66.3785	65.03
2018-06-09	252.517	11.77	75.8367	70.4686	53.85
2018-06-10	252.575	11.88	77.7589	68.1736	51.15
2018-06-11	271.436	12.45	75.5092	70.4248	50.84
2018-06-12	253.648	11.89	84.2757	65.8868	52.61
2018-06-13	268.325	11.69	95.4004	70.0182	48.34
2018-06-14	280.666	11.16	88.4641	71.5587	53.81
2018-06-15	272.917	11.08	90.4448	70.3248	56.24
2018-06-16	255.14	11.28	92.3281	68.9876	52.01
2018-06-17	255.307	11.21	98.5355	69.4058	49.22
2018-06-18	262.031		122.236	66.8322
2018-06-19	261.994	11.84	101.64	69.3397	43.03
2018-06-20	270.604	12.13	107.91	69.3463	44.53
2018-06-21	264.903	12.4	112.976	75	44.93
2018-06-22	290.29	11.94	125.682	72.8264	47.44
2018-06-23	291.524	12.04	86.6721	73.338	46.89
2018-06-24	277.473	12.24	99.041	71.3413	51.13
2018-06-25	244.861	12.45	63.1795	74.2934	51.21
2018-06-26	200.304	12.61	84.2739	79.9174	50.91
2018-06-27	204.238	13.51	80.5451	83.8926	47.6
2018-06-28	222.349	13.55	79.8066	84.2793	49.03
2018-06-29	223.662	10.76	84.1621	82.9306	66.56
2018-06-30	243.094	11.81	85.5389	80.8355	62.89
2018-07-01	185.538	12.53	85.2415	78.6413	59
2018-07-02	153.882	11.92	64.8264	83.1876	60.06
2018-07-03	123.643	12.99	56.5804	86.2926	54.01
2018-07-04	137.829		85.296	86.0595
2018-07-05	144.712	13.37	51.9038	85.1479	50.17
2018-07-06	185.741	14	76.472	81.3008	48.69
2018-07-07	218.088	14.55	74.2925	75.0504	47.79
2018-07-08	179.021	12.99	63.0974	81.1546	63.67
2018-07-09	200.108	10.87	78.1571	77.7099	78.09
2018-07-10	259.805	10.16	90.5882	80.0256	75.65
2018-07-11	243.398	10.27	74.6834	83.3752	76.14
2018-07-12	228.647	10.23	82.8906	82.4446	75.84
2018-07-13	250.236	11.55	97.3358	78.6331	67.63
2018-07-14	257.653	12.06	88.1986	77.0859	64.03
2018-07-15	230.61	10.44	83.6113	80.7041	73.33
2018-07-16	222.679	10.59	93.145	78.9066	69.45
2018-07-17	233.107	12.15	90.5844	77.9512	62.62
2018-07-18	252.069	12.34	86.8228	74.7174	62.09
2018-07-19	249.518	10.45	89.5243	74.9182	72.8
2018-07-20	242.194	10.85	91.9014	76.557	72.94
2018-07-21	242.025	10.72	79.8319	76.1876	73.63
2018-07-22	246.85	9.58	66.7563	77.0884	77.98
2018-07-23	226.874	9.39	80.6071	74.3777	77.5
2018-07-24	225.559	9.73	85.5567	76.9479	70.4
2018-07-25	207.207	10.68	80.4242	81.2463	71.16
2018-07-26	213.966	11.86	76.9565	83.457	64.08
2018-07-27	186.127	11.33	88.7987	84.1099	67.78
2018-07-28	226.528		82.4307	82.5917
2018-07-29	217.145	11.67	81.703	84.6587	63.08
2018-07-30	191.57	11.99	86.3621	86.5777	63.29
2018-07-31	168.27		79.5711	84.7711
2018-08-01	147.798	9.67	78.7609	86.5645	73.81
2018-08-02	153.128	8.64	74.6179	84.7793	80.7
2018-08-03	137.994	9.94	73.4048	85.8264	74.68
2018-08-04	144.11	9.69	67.4152	86.562	78.7
2018-08-05	164.956	8.77	52.7525	88.2545	84
2018-08-06	118.584	9.62	75.0105	88.4149	76.44
2018-08-07	206.308	10.72	73.4417	81.4471	65.33
2018-08-08	240.416	10.88	77.3975	79.7306	63.19
2018-08-09	264.801	10.58	73.8451	78.0785	70.18
2018-08-10	238.697	10.51	75.7405	80.1008	73.06
2018-08-11	226.817	9.95	70.1371	78.0546	76.94
2018-08-12	209.888	9.83	73.0073	79.1669	68.74
2018-08-13	180.104	10.19	79.2584	80.0719	76.53
2018-08-14	197.338	10.48	85.8629	79.0116	73.78
2018-08-15	230.253	11.58	86.7858	77.1157	63
2018-08-16	232.321	11.75	80.4866	78.6694	64.34
2018-08-17	248.35	11.85	83.5543	77.9388	64.29
2018-08-18	239.753	11.36	81.7425	75.1058	65.09
2018-08-19	240.879	11.86	78.3134	76.0033	62.17
2018-08-20	241.205	11.87	78.0607	75.6017	62.84
2018-08-21	247.655	10.68	75.8888	76.5603	72.33
2018-08-22	267.882	9.33	66.1534	73.0107	78.14
2018-08-23	222.787	11.51	82.9211	75.5703	69.21
2018-08-24	215.061	11.02	90.3057	80.6661	69.19
2018-08-25	196.983	10.58	85.0864	81.6893	72.42
2018-08-26	184.383	11.67	78.5174	81.6298	64.07
2018-08-27	201.296	11.92	72.5786	84.6694	63.11
2018-08-28	204.443	9.96	70.6358	82.1554	74.43
2018-08-29	195.661	11.26	80.2032	81.438	65.68
2018-08-30	185.314	10.61	80.485	79.3802	73.16
2018-08-31	212.766	11.56	77.7519	81.857	64.94
2018-09-01	211.153		90.2766	82.9297
2018-09-02	210.965	11.8	79.2414	81.238	60.49
2018-09-03	224.14	12.07	66.7893	81.7074	56.26
2018-09-04	237.74	11.89	77.3104	82.6744	55.97
2018-09-05	247.815	12.27	75.1779	81.8512	51.2
2018-09-06	251.011	12.48	68.2781	81.2769	52.28
2018-09-07	220.312	11.73	53.4256	80.7372	50.82
2018-09-08	235.545	11.1	81.3753	77.9537	51.92
2018-09-09	238.969	11.63	79.1585	78.9364	55.94
2018-09-10	233.526	12.68	69.5054	77.943	57.76
2018-09-11	201.931	12.11	76.5362	80.1463	55.97
2018-09-12	202.398	11.23	73.9471	76.7182	55.5
2018-09-13	203.936	9.9	84.6777	79.0157	55.35
2018-09-14	241.559	9.1	87.1661	76.5422	56.2
2018-09-15	238.149	9.17	92.0307	75.9934	55.28
2018-09-16	260.889	8.4	96.8198	70.2463	58.38
2018-09-17	267.576	8.6	92.9863	70.9182	51.22
2018-09-18	267.885	8.73	83.0542	48.3884	47.67
2018-09-19	268.711	9.37	71.1172	70.3901	47.78
2018-09-20	280.131	9.1	78.0022	74.8273	50.44
2018-09-21	247.283	9.21	73.1008	73.0669	56.1
2018-09-22	238.207	9.16	76.0745	71.2306	55.02
2018-09-23	230.347	9.61	73.1877	65.6331	54.51
2018-09-24	242.676	9.98	75.6111	69.7917	53.42
2018-09-25	248.26	9.72	71.5928	60.4992	52.01
2018-09-26	227.269	9.44	68.3149	69.2562	51.42
2018-09-27	241.662	8.76	75.8104	71.3934	54.21
2018-09-28	217.679	8.39	76.6098	73.824	52.15
2018-09-29	253.307	8.1	76.3144	40.8546	50.23
2018-09-30	240.091	7.88	78.6151	67.4562	53.14
2018-10-01	248.538	7.6	81.6424	65.5917	52.29
2018-10-02	249.667	7.23	86.8878	57.5455	40.1
2018-10-03	247.945	5.92	84.3802	54.4628	43.68
2018-10-04	250.892	4.66	85.1521	60.1488	50.47
2018-10-05	253.496	4.46	88.1603	68.0281	49.79
2018-10-06	252.996	3.56	87.1038	63.2992	48.84
2018-10-07	254.569	2.83	90.8422	63.8	47.45
2018-10-08	256.387	2.33	88.2758	59.3174	47.38
2018-10-09	257.283	3.11	75.2692	55.8752	41.31
2018-10-10	248.109	3.64	83.901	61.0331	42.13
2018-10-11	236.366	3.25	80.9912	67.1669	47.28
2018-10-12	242.207	3.41	90.2102	70.7967	45.58
2018-10-13	227.188	3.5	85.0116	69.205	35.36
2018-10-14	245.379	3.49	88.1628	30.7769	34.35
2018-10-15	237.491	3.32	89.4497	62.4653	37.33
2018-10-16	238.973	3.39	86.3309	40.5306	40.03
2018-10-17	236.855	4	82.768	61.4669	43.87
2018-10-18	229.861	4.63	85.0858	34.8744	28.07
2018-10-19	235.583	2.49	85.2183	60.1339	35.92
2018-10-20	230.643	2.11	87.0386	44.3777	37.51
2018-10-21	234.831	1.9	85.7886	52.5198	36.02
2018-10-22	232.005	1.36	87.6051	50.0132	40.67
2018-10-23	220.515	0.1	80.5484	41.5322	41.53
2018-10-24	225.12	-1.25	82.6147	41.776	41.12
2018-10-25	234.981	-1.86	81.5034	44.6826	44.08
2018-10-26	226.394	-0.93	88.1133	40.905	38.28
2018-10-27	231.575	-1.3	83.8864	29.5132	40.2
2018-10-28	239.321	-1.03	79.5495	48.486	27.9
2018-10-29	217.037	-0.81	61.4004	36.7909	29.38
2018-10-30	190.227		80.1766	56.6207
2018-10-31	217.858	-0.15	76.5312	41.5967	21.69
Note: the O3 data at NCO-P which was used in this study can be retrived from the reference listed as follows, Putero, D., Marinoni, A., Bonasoni, P., Calzolari, F., Rupakheti, M., and Cristofanelli, P.: Black carbon and ozone variability at the Kathmandu Valley and at the southern Himalayas: a comparison between a “hot spot” and a downwind high-altitude site, Aerosol Air Qual. Res., 18, 623-635+ …

## Sheet: Fig.7
Dataset for Fig. 7: Modeled monthly-mean D17O(SO42-)SAS values as well as relative importance of various sulfate formation pathways under different conditions
pH = 4.5 + no sulfate formation on dust surface
Month	modeled D17O(SO42-)SAS (‰)		modeled relative importance of various sulfate formation pathways (％)
	D17O	1σ	SO2+OH	S(IV) + H2O2	S(IV) + O3	S(IV) + O2 (TMIs)	S(IV) + HOBr
Jan	0.404339	0.0385095	65.5261	18.2414	4.10941	8.70403	3.41909
Feb	0.514828	0.0463835	58.384	21.7261	5.40926	10.583	3.89769
Mar	0.456262	0.0526495	54.9528	25.6241	4.02203	10.163	5.23808
Apr	0.498118	0.0478718	57.603	22.7416	4.97769	7.36424	7.31354
May	0.557831	0.0445106	56.672	20.2067	6.21779	7.97874	8.92473
Jun	0.50333	0.0512211	58.1573	24.5806	4.79339	4.88545	7.58334
Jul	0.714046	0.0904693	38.6842	44.4468	5.6037	5.76908	5.49622
Aug	0.595252	0.0791481	43.7789	39.0023	4.46818	7.19838	5.55218
Sep	0.532193	0.0644351	52.6519	31.5353	4.39666	5.87299	5.54316
Oct	0.443381	0.0469468	62.7155	22.6497	4.10922	4.9158	5.60979
Nov	0.271716	0.0320149	75.0446	15.6278	2.31038	3.4807	3.53654
Dec	0.588265	0.0549571	54.772	25.9578	6.00974	10.0307	3.22967
pH variable + no sulfate formation on dust surface
Month	modeled D17O(SO42-)SAS (‰)		modeled relative importance of various sulfate formation pathways (％)
	D17O	1σ	SO2+OH	S(IV) + H2O2	S(IV) + O3	S(IV) + O2 (TMIs)	S(IV) + HOBr
Jan	0.782197	0.0448323	59.0722	16.3999	10.1877	11.204	3.13624
Feb	0.922493	0.0530169	51.7511	19.4604	11.9999	13.1806	3.60802
Mar	0.971364	0.0580521	48.7443	22.3099	12.3788	11.7393	4.82765
Apr	1.54719	0.0734765	45.862	16.3088	21.9466	9.81326	6.06937
May	1.88299	0.0863099	40.9165	10.854	27.8451	13.7809	6.60348
Jun	1.073	0.058907	52.1088	20.5337	14.0772	6.28737	6.99295
Jul	1.89399	0.0991487	29.9693	31.786	25.362	8.82914	4.05356
Aug	1.78358	0.0894923	34.2555	25.6033	24.4648	11.4592	4.2172
Sep	2.15864	0.0996331	36.7525	16.2756	31.3885	11.8197	3.76357
Oct	1.2839	0.0631784	54.4577	16.999	17.7503	5.85953	4.93346
Nov	0.897234	0.0451982	66.9175	13.1536	12.2511	4.31752	3.36018
Dec	1.14172	0.0635088	46.7871	22.3979	15.0063	12.8767	1
pH variable + sulfate formation on dust surface
Month	modeled D17O(SO42-)SAS (‰)		modeled relative importance of various sulfate formation pathways (％)
	D17O	1σ	SO2+OH	S(IV) + H2O2	S(IV) + O3	S(IV) + O2 (TMIs)	S(IV) + HOBr	S(IV) + O3 (dust surface)
Jan	0.790958	0.044629	59.0601	16.3118	10.1513	11.244	3.05018	0.182614
Feb	0.965517	0.0527423	51.397	19.1824	12.0641	13.1949	3.52944	0.632083
Mar	1.05119	0.057815	47.9595	21.7873	12.6659	11.8793	4.70064	1.00739
Apr	1.60315	0.0738318	45.3485	15.9948	22.1806	9.87128	5.93821	0.666616
May	1.91442	0.0861111	40.6217	10.6827	27.8062	13.832	6.51301	0.544387
Jun	1.1105	0.058751	51.7938	20.3153	14.1454	6.29805	6.91167	0.535773
Jul	2.10917	0.0956401	28.5472	30.1198	24.7616	8.59613	3.86289	4.11236
Aug	1.90706	0.088876	33.2431	24.6706	24.6405	11.5188	4.08731	1.83968
Sep	2.21685	0.0993378	36.1904	15.8822	31.3741	11.8977	3.69592	0.959591
Oct	1.31581	0.0632093	54.1645	16.7697	17.8591	5.91167	4.88389	0.411168
Nov	0.912093	0.0450588	66.8214	13.0118	12.2614	4.33542	3.33392	0.236082
Dec	1.16203	0.0632084	46.694	22.1678	15.0172	12.8835	2.90743	0.330068
